# Supplementary material for: SARS-CoV-2 antibody seroprevalence in a large neuroimmunological patient cohort
Source: Springer Nature journal article supplement (doi:10.1007/s00415-021-10818-w), 2021-10-05

Bitte so markieren:      Bitte verwenden Sie einen Kugelschreiber oder nicht zu starken Filzstift. Dieser Fragebogen wird maschinell erfasst.  
Korrektur:      Bitte beachten Sie im Interesse einer optimalen Datenerfassung die links gegebenen Hinweise beim Ausfüllen.

**1. During the "lockdown", how strongly did you adhere to official recommendations regarding the following?**

- 1.1 Curfew Not at all      Very much
- 1.2 Hygiene Not at all      Very much
- 1.3 Reduction of social contacts Not at all      Very much

**2. After the "lockdown", how strongly did you adhere to official recommendation regarding the following?**

- 2.1 Curfew Not at all      Very much
- 2.2 Hygiene Not at all      Very much
- 2.3 Reduction of social contacts Not at all      Very much

**3. To be filled in by the study team**

BiobaMS ID

|  |  |  |  |
|--|--|--|--|
|  |  |  |  |
|--|--|--|--|

- 1
- 2
- 3
- 4
- 5
- 6
- 7
- 8
- 9
- 0

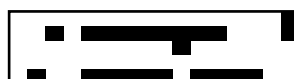

Supplement: MOESM1 [file 19730254]
